# Supplementary material for: Quantitative analysis of phenanthrene in soil by fluorescence spectroscopy coupled with the CARS-PLS model
Source: Royal Society of Chemistry journal article supplement (doi:10.1039/d2ra08279a), 2023-01-01
Supplement: d2ra08279a1.pdf [file d2ra08279a1.pdf]

## Quantitative analysis of phenanthrene in soil by fluorescence spectroscopy coupled with CARS-PLS model

Haonan Li,<sup>a</sup> Maogang Li,<sup>a</sup> Hongsheng Tang,<sup>a</sup> Hua Li,<sup>ab</sup> Tianlong Zhang,<sup>\*a</sup> and Xiao-Feng Yang,<sup>\*a</sup>

<sup>a</sup>Key Laboratory of Synthetic and Natural Functional Molecule of the Ministry of Education,

<sup>b</sup>College of Chemistry & Materials Science, Northwest University, Xi'an, 710127, China

<sup>c</sup>College of Chemistry and Chemical Engineering, Xi'an Shiyou University, Xi'an, 710065, China

\*Corresponding author. Email: [tlzhang@nwu.edu.cn](mailto:tlzhang@nwu.edu.cn)(T. L. Zhang), [xfyang@nwu.edu.cn](mailto:xfyang@nwu.edu.cn)(X. F. Yang)

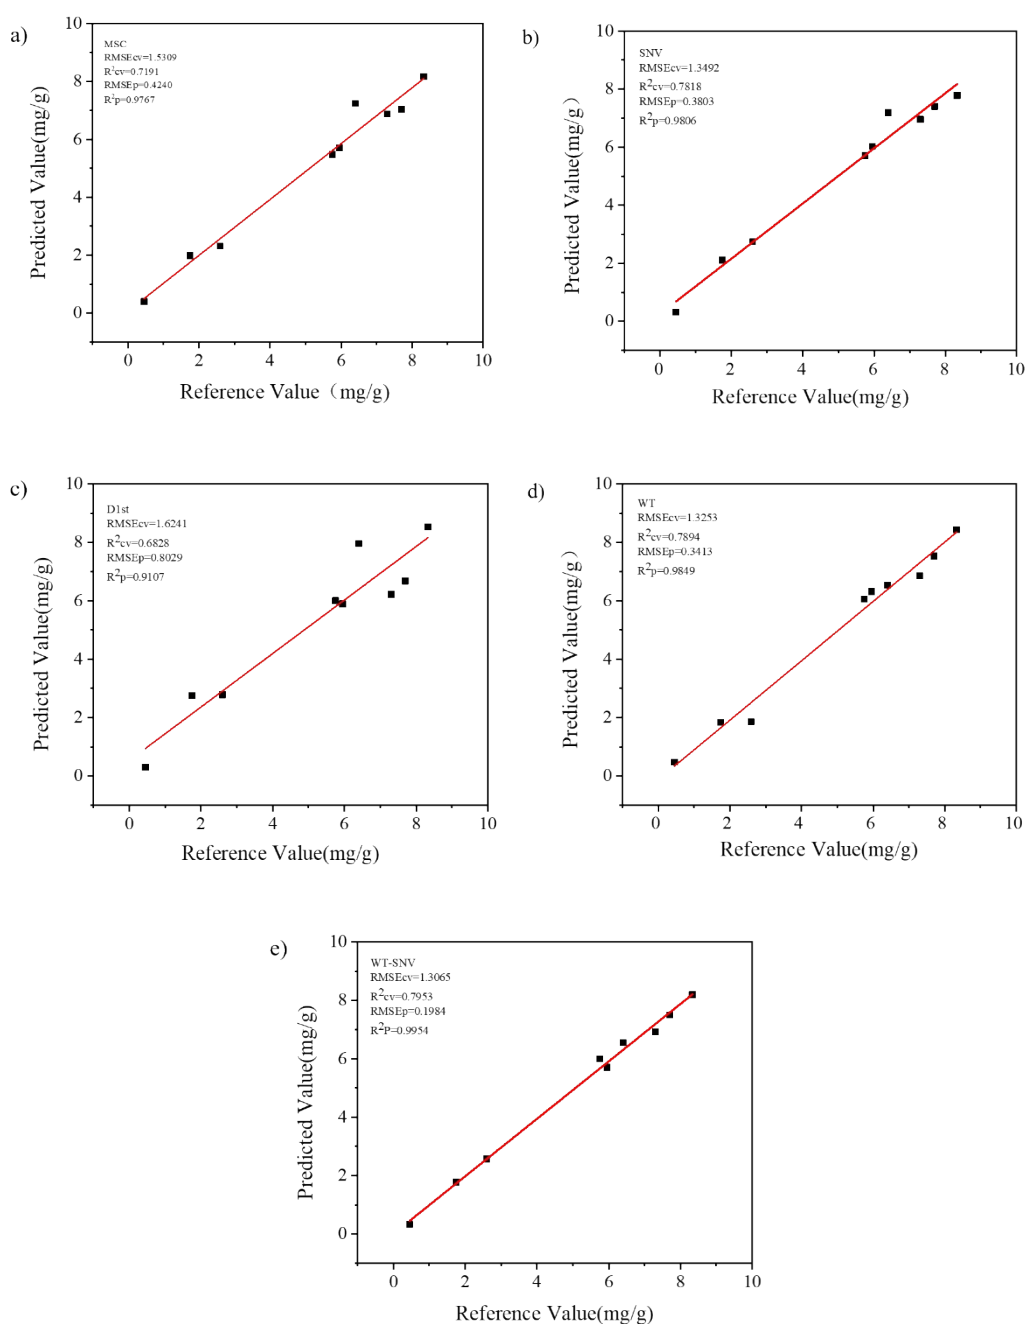

Fig. S1 Prediction performance of different pre-processing methods: a) MSC; b) SNV; C) D1st; d) WT; e) WT-SNV.
